# Supplementary material for: Calciprotein Particles Cause Physiologically Significant Pro-Inflammatory Response in Endothelial Cells and Systemic Circulation
Source: MDPI journal article supplement (doi:10.3390/ijms232314941), 2022-11-29
Supplement: s1 [file s1]

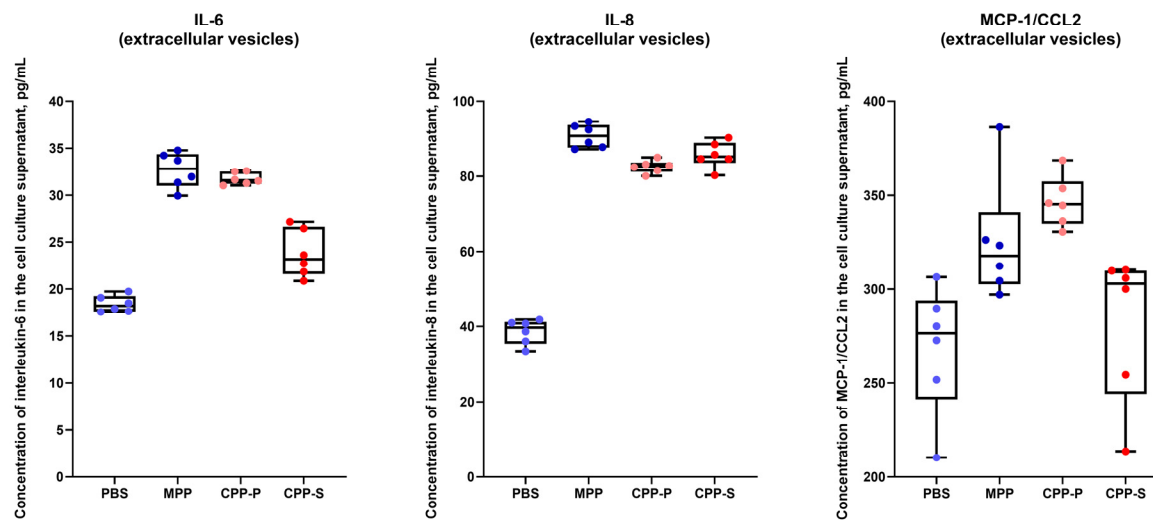

**Figure S1.** Cytokine profiling of the conditioned medium from intact HCAEC treated with extracellular vesicles from HCAEC incubated with MPPs, CPP-P, CPP-S, or control PBS solution for 24 hours. Specific enzyme-linked immunosorbent assay kits for the measurement of IL-6 (left), IL-8 (center), and MCP-1/CCL2 (right). Each dot on the plots represents one measurement (n = 6 measurements per group). Whiskers indicate the range, box bounds indicate the 25<sup>th</sup>–75<sup>th</sup> percentiles, and centre lines indicate the median.

**Table S1.** Complete blood count measurements of the human blood co-incubated with MPPs, CPP-P, CPP-S, or control physiological saline solution (PS, 0.9% NaCl) for 0.5, 2, 4, or 24 hours.

| Complete blood count parameter | 0 min | 30 minutes |     |       |       |          | 2 hours |     |       |       |          | 4 hours |     |       |       |          | 24 hours |     |       |       |          |
|--------------------------------|-------|------------|-----|-------|-------|----------|---------|-----|-------|-------|----------|---------|-----|-------|-------|----------|----------|-----|-------|-------|----------|
|                                |       | PS         | MPP | CPP-P | CPP-S | <i>p</i> | PS      | MPP | CPP-P | CPP-S | <i>p</i> | PS      | MPP | CPP-P | CPP-S | <i>p</i> | PS       | MPP | CPP-P | CPP-S | <i>p</i> |
| Human blood                    |       |            |     |       |       |          |         |     |       |       |          |         |     |       |       |          |          |     |       |       |          |
| White blood cell count (WBC)   | 9.3   | 8.9        | 9.0 | 9.0   | 9.0   | 0.9      | 9.0     | 9.2 | 8.8   | 9.0   | 0.8      | 9.0     | 9.0 | 8.8   | 9.0   | 0.9      | 8.2      | 9.0 | 9.0   | 8.8   | 0.1      |
| Neutrophil count (NE#)         | 4.8   | 4.7        | 4.5 | 4.7   | 4.5   | 0.7      | 4.5     | 4.5 | 4.5   | 4.5   | 0.5      | 4.7     | 4.7 | 4.7   | 4.7   | 0.9      | 4.5      | 5.2 | 4.7   | 4.5   | 0.2      |
| Neutrophil percentage (NE%)    | 51    | 52         | 50  | 52    | 51    | 0.8      | 51      | 50  | 51    | 51    | 0.9      | 51      | 52  | 50    | 52    | 0.9      | 53       | 57  | 54    | 52    | 0.3      |
| Lymphocyte count (LY#)         | 3.5   | 3.4        | 3.6 | 3.2   | 3.0   | 0.4      | 3.4     | 3.5 | 3.2   | 3.2   | 0.6      | 3.2     | 3.5 | 3.5   | 3.2   | 0.5      | 3.0      | 2.8 | 3.0   | 3.0   | 0.7      |
| Lymphocyte percentage (LY%)    | 36    | 36         | 37  | 35    | 36    | 0.8      | 36      | 36  | 36    | 35    | 0.9      | 35      | 35  | 37    | 35    | 0.8      | 34       | 32  | 34    | 36    | 0.8      |
| Monocyte count (MO#)           | 1.0   | 1.0        | 1.0 | 1.0   | 1.1   | 0.7      | 1.0     | 1.0 | 1.1   | 1.0   | 0.8      | 1.1     | 1.1 | 1.1   | 1.1   | 0.9      | 1.0      | 0.9 | 1.0   | 0.9   | 0.9      |
| Monocyte percentage (MO%)      | 10    | 10         | 10  | 10    | 11    | 0.9      | 10      | 10  | 11    | 10    | 0.9      | 11      | 11  | 11    | 11    | 0.8      | 10       | 9   | 10    | 9     | 0.2      |
| Red blood cell count (RBC)     | 4.7   | 4.6        | 4.5 | 4.6   | 4.5   | 0.6      | 4.5     | 4.5 | 4.5   | 4.4   | 0.7      | 4.6     | 4.6 | 4.5   | 4.5   | 0.2      | 4.6      | 4.7 | 4.7   | 4.6   | 0.1      |
| Haemoglobin (HGB)              | 145   | 137        | 138 | 139   | 135   | 0.8      | 135     | 135 | 135   | 135   | 0.7      | 138     | 139 | 137   | 135   | 0.6      | 139      | 140 | 139   | 138   | 0.7      |
| Haematocrit (HCT)              | 44    | 43         | 43  | 43    | 42    | 0.8      | 43      | 44  | 43    | 43    | 0.9      | 44      | 44  | 44    | 44    | 0.7      | 47       | 49  | 48    | 48    | 0.4      |

|                                                  |      |      |      |      |      |     |      |      |      |      |     |      |      |      |      |     |      |      |      |      |     |
|--------------------------------------------------|------|------|------|------|------|-----|------|------|------|------|-----|------|------|------|------|-----|------|------|------|------|-----|
| Mean corpuscular volume (MCV)                    | 92   | 94   | 94   | 95   | 95   | 0.8 | 95   | 96   | 96   | 96   | 0.9 | 96   | 97   | 97   | 97   | 0.7 | 102  | 105  | 102  | 103  | 0.1 |
| Mean corpuscular hemoglobin (MCH)                | 30.2 | 30.1 | 30.1 | 30.1 | 30.3 | 0.5 | 30.0 | 29.9 | 30.0 | 30.4 | 0.3 | 30.0 | 30.3 | 29.9 | 30.2 | 0.3 | 30.4 | 30.0 | 29.8 | 30.1 | 0.3 |
| Mean corpuscular hemoglobin concentration (MCHC) | 330  | 319  | 322  | 318  | 320  | 0.9 | 316  | 311  | 311  | 317  | 0.7 | 309  | 311  | 307  | 312  | 0.5 | 293  | 285  | 290  | 293  | 0.1 |
| Red cell distribution width (RDW-CV)             | 12.2 | 12.4 | 12.2 | 12.3 | 12.3 | 0.9 | 12.4 | 12.3 | 12.2 | 12.4 | 0.6 | 12.5 | 12.5 | 12.5 | 12.5 | 0.7 | 14.0 | 14.5 | 13.8 | 14.0 | 0.3 |
| Platelet count (PLT)                             | 246  | 242  | 243  | 240  | 248  | 0.4 | 236  | 235  | 240  | 235  | 0.8 | 242  | 228  | 228  | 235  | 0.5 | 233  | 230  | 228  | 228  | 0.4 |
| Plateletcrit (PCT)                               | 0.26 | 0.26 | 0.25 | 0.25 | 0.29 | 0.2 | 0.25 | 0.25 | 0.25 | 0.25 | 0.8 | 0.25 | 0.25 | 0.25 | 0.25 | 0.3 | 0.25 | 0.25 | 0.25 | 0.25 | 0.9 |
| Mean platelet volume (MPV)                       | 11.1 | 11.2 | 11.1 | 11.2 | 11.1 | 0.9 | 10.9 | 11.3 | 11.0 | 11.0 | 0.5 | 10.6 | 10.5 | 10.5 | 10.7 | 0.3 | 10.7 | 11.0 | 10.5 | 10.7 | 0.3 |
| Platelet distribution width (PDW)                | 13.6 | 12.8 | 12.6 | 12.7 | 12.7 | 0.9 | 12.5 | 12.6 | 12.6 | 12.5 | 0.9 | 11.9 | 11.4 | 11.7 | 11.5 | 0.6 | 12.3 | 12.0 | 11.4 | 10.9 | 0.1 |

**Table S2.** Primers for the quantitative reverse transcription polymerase chain reaction and its parameters.

| Gene                                  | Forward primer                | Reverse primer                  |
|---------------------------------------|-------------------------------|---------------------------------|
| Cell adhesion molecules               |                               |                                 |
| <i>VCAM1</i>                          | 5'-CGTCTTGGTCAGCCCTTCCT-3'    | 5'-ACATTCATATACTCCCGCATCCTTC-3' |
| <i>ICAM1</i>                          | 5'-TTGGGCATAGAGACCCCGTT-3'    | 5'-GCACATTGCTCAGTTCATACACC-3'   |
| <i>SELE</i>                           | 5'-GCACAGCCTTGTCCAACC-3'      | 5'-ACCTCACCAAACCCTTCG-3'        |
| <i>SELP</i>                           | 5'-ATGGGTGGGAACCAAAAAGG-3'    | 5'-GGCTGACGGACTCTTGATGTAT-3'    |
| Pro-inflammatory cytokines            |                               |                                 |
| <i>IL6</i>                            | 5'-GGCACTGGCAGAAAACAACC-3'    | 5'-GCAAGTCTCCTCATTGAATCC-3'     |
| <i>CXCL8</i>                          | 5'-CAGAGACAGCAGAGCACAC-3'     | 5'-AGTTCTTTAGCACTCCTTGGC-3'     |
| <i>CCL2</i>                           | 5'-TTCTGTGCCTGCTGCTCATAG-3'   | 5'-AGGTGACTGGGGCATTGATTG-3'     |
| <i>CXCL1</i>                          | 5'-GCTTGCCCTCAATCCTGCATCC-3'  | 5'-ACAATCCAGGTGGCCTCTGC-3'      |
| <i>MIF</i>                            | 5'-GGTGTCCGAGAAGTCAGGCA-3'    | 5'-GGGGCACGTTGGTGTTTACG-3'      |
| NO synthase                           |                               |                                 |
| <i>NOS3</i>                           | 5'-GTGATGGCGAAGCGAGTGAAG-3'   | 5'-CCGAGCCCGAACACACAGAAC-3'     |
| Endothelial-to-mesenchymal transition |                               |                                 |
| <i>SNAI1</i>                          | 5'-CAGACCCACTCAGATGTCAAGAA-3' | 5'-GGGCAGGTATGGAGAGGAAGA-3'     |
| <i>SNAI2</i>                          | 5'-ACTCCGAAGCCAAATGACAA-3'    | 5'-CTCTCTCTGTGGGTGTGTGT-3'      |
| <i>TWIST1</i>                         | 5'-GTCCGCAGTCTTACGAGGAG-3'    | 5'-GCTTGAGGGTCTGAATCTTGCT-3'    |
| <i>ZEB1</i>                           | 5'-GATGATGAATGCGAGTCAGATGC-3' | 5'-ACAGCAGTGTCTTGTTGTTGT-3'     |
| <i>CDH5</i>                           | 5'-AAGCGTGAGTCGCAAGAATG-3'    | 5'-TCTCCAGGTTTTCGCCAGTG-3'      |
| <i>CDH2</i>                           | 5'-GCTTCTGGTGAAATCGCATTA-3'   | 5'-AGTCTCTCTTCTGCCTTTGTAG-3'    |
| Arterial to venous transition         |                               |                                 |
| <i>HES1</i>                           | 5'-AGATAGCTCGCGGCATTCCAAG-3'  | 5'-ACTTCCCCAGCACACTTGGGT-3'     |
| <i>HEY1</i>                           | 5'-GCCGACGAGACCGGATCAAT-3'    | 5'-GGCGTGCGCGTCAAAGTAA-3'       |

|                    |                              |                              |
|--------------------|------------------------------|------------------------------|
| <i>HEY2</i>        | 5'-ACCTCCGAGAGCGACATGGA-3'   | 5'-CGATCCCGACGCCTTTTCTC-3'   |
| <i>NOTCH1</i>      | 5'-GCTCACGCTGACGGAGTACA-3'   | 5'-ATGGAAGCTGGGTGGGCAGT-3'   |
| <i>NR2F2</i>       | 5'-AGAGCAAGTGGAGAAGCTCAAG-3' | 5'-TACATCAGAGAGACCACAGGCA-3' |
| Housekeeping genes |                              |                              |
| <i>PECAM1</i>      | 5'-TGGCGCATGCCTGTAGTA-3'     | 5'-TCCGTTTCCTGGGTCAA-3'      |

**Table S3.** Average  $\Delta$ Ct values and their standard deviations (HCAEC).

|              | HCAEC                       |                        |                        |                        |                                                   |                         |                         |                        |                          |                            |                          |                           |
|--------------|-----------------------------|------------------------|------------------------|------------------------|---------------------------------------------------|-------------------------|-------------------------|------------------------|--------------------------|----------------------------|--------------------------|---------------------------|
|              | Complete conditioned medium |                        |                        |                        | Extracellular vesicle-depleted conditioned medium |                         |                         |                        | Extracellular vesicles   |                            |                          |                           |
|              | PBS                         | MPP                    | CPP-P                  | CPP-S                  | PBS                                               | MPP                     | CPP-P                   | CPP-S                  | PBS                      | MPP                        | CPP-P                    | CPP-S                     |
|              |                             |                        |                        |                        |                                                   |                         |                         |                        |                          |                            |                          |                           |
| <i>VCAM1</i> | 0.0021 $\pm$<br>0.0008      | 0.0012 $\pm$<br>0.0002 | 0.0124 $\pm$<br>0.0003 | 0.0054 $\pm$<br>0.0015 | 0.0024 $\pm$<br>0.0005                            | 0.0016 $\pm$<br>0.0003  | 0.0009 $\pm$<br>0.0001  | 0.0013 $\pm$<br>0.0011 | -                        | -                          | -                        | -                         |
|              | 1                           | 0.57                   | 5.90                   | 2.57                   | 1                                                 | 0.67                    | 0.38                    | 0.54                   | -                        | -                          | -                        | -                         |
|              |                             |                        |                        |                        |                                                   |                         |                         |                        |                          |                            |                          |                           |
| <i>ICAM1</i> | 0.0232 $\pm$<br>0.0049      | 0.0196 $\pm$<br>0.0045 | 0.0221 $\pm$<br>0.0038 | 0.0968 $\pm$<br>0.0136 | 0.0164 $\pm$<br>0.0043                            | 0.0127 $\pm$<br>0.0031  | 0.0214 $\pm$<br>0.0009  | 0.0210 $\pm$<br>0.0064 | 0.0096 $\pm$<br>0.0042   | 0.0090 $\pm$<br>0.0020     | 0.0170 $\pm$<br>0.0059   | 0.0599 $\pm$<br>0.0221    |
|              | 1                           | 0.84                   | 0.95                   | 4.17                   | 1                                                 | 0.77                    | 1.30                    | 1.28                   | 1                        | 0.94                       | 1.77                     | 6.23                      |
|              |                             |                        |                        |                        |                                                   |                         |                         |                        |                          |                            |                          |                           |
| <i>SELE</i>  | 0.0007 $\pm$<br>0.0003      | 0.0002 $\pm$<br>0.0001 | 0.0025 $\pm$<br>0.0006 | 0.0035 $\pm$<br>0.0012 | 0.0014 $\pm$<br>0.0003                            | 0.0005 $\pm$<br>0.00005 | 0.0002 $\pm$<br>0.00001 | 0.0015 $\pm$<br>0.0001 | 0.00006 $\pm$<br>0.00002 | 0.00013 $\pm$<br>0.0000003 | 0.00005 $\pm$<br>0.00006 | 0.000014<br>$\pm$ 0.00004 |
|              | 1                           | 0.28                   | 3.57                   | 5                      | 1                                                 | 0.36                    | 0.14                    | 1.07                   | 1                        | 2.16                       | 0.83                     | 0.23                      |
|              |                             |                        |                        |                        |                                                   |                         |                         |                        |                          |                            |                          |                           |
| <i>SELP</i>  | 0.0197 $\pm$<br>0.0060      | 0.0183 $\pm$<br>0.0058 | 0.0319 $\pm$<br>0.0031 | 0.0780 $\pm$<br>0.0177 | 0.0151 $\pm$<br>0.0021                            | 0.0081 $\pm$<br>0.0014  | 0.0101 $\pm$<br>0.0007  | 0.0092 $\pm$<br>0.0017 | 0.0328 $\pm$<br>0.0082   | 0.0192 $\pm$<br>0.0077     | 0.0250 $\pm$<br>0.0137   | 0.0584 $\pm$<br>0.0066    |
|              | 1                           | 0.92                   | 1.61                   | 3.95                   | 1                                                 | 0.54                    | 0.67                    | 0.61                   | 1                        | 0.58                       | 0.76                     | 1.78                      |
|              |                             |                        |                        |                        |                                                   |                         |                         |                        |                          |                            |                          |                           |
| <i>IL6</i>   | 0.0048 $\pm$<br>0.0224      | 0.0033 $\pm$<br>0.0011 | 0.0087 $\pm$<br>0.0079 | 0.0260 $\pm$<br>0.0079 | 0.0040 $\pm$<br>0.0009                            | 0.0037 $\pm$<br>0.0005  | 0.0034 $\pm$<br>0.0001  | 0.0023 $\pm$<br>0.0020 | 0.0015 $\pm$<br>0.0004   | 0.0048 $\pm$<br>0.0016     | 0.0037 $\pm$<br>0.0034   | 0.0027 $\pm$<br>0.0009    |
|              | 1                           | 0.68                   | 1.81                   | 5.41                   | 1                                                 | 0.93                    | 0.85                    | 0.58                   | 1                        | 3.2                        | 2.46                     | 1.8                       |
|              |                             |                        |                        |                        |                                                   |                         |                         |                        |                          |                            |                          |                           |
| <i>CXCL8</i> | 0.0487 $\pm$<br>0.0224      | 0.0485 $\pm$<br>0.0137 | 0.4233 $\pm$<br>0.3904 | 0.2463 $\pm$<br>0.0544 | 0.0524 $\pm$<br>0.0095                            | 0.0521 $\pm$<br>0.0066  | 0.1523 $\pm$<br>0.0014  | 0.0562 $\pm$<br>0.0491 | 0.0092 $\pm$<br>0.0014   | 0.0244 $\pm$<br>0.0061     | 0.0199 $\pm$<br>0.0073   | 0.0116 $\pm$<br>0.0026    |
|              | 1                           | 0.99                   | 8.69                   | 5.05                   | 1                                                 | 0.99                    | 2.91                    | 1.07                   | 1                        | 2.65                       | 2.16                     | 1.26                      |
|              |                             |                        |                        |                        |                                                   |                         |                         |                        |                          |                            |                          |                           |
| <i>CCL2</i>  | 0.0855 $\pm$<br>0.0310      | 0.0529 $\pm$<br>0.0156 | 0.2691 $\pm$<br>0.0364 | 0.2914 $\pm$<br>0.0749 | 0.0435 $\pm$<br>0.0073                            | 0.0396 $\pm$<br>0.0073  | 0.0748 $\pm$<br>0.0055  | 0.0391 $\pm$<br>0.0344 | 0.0222 $\pm$<br>0.0046   | 0.0244 $\pm$<br>0.0077     | 0.0218 $\pm$<br>0.0046   | 0.0117 $\pm$<br>0.0031    |
|              | 1                           | 0.61                   | 3.14                   | 3.40                   | 1                                                 | 0.91                    | 1.72                    | 0.90                   | 1                        | 1.09                       | 0.98                     | 0.52                      |
|              |                             |                        |                        |                        |                                                   |                         |                         |                        |                          |                            |                          |                           |

|               |           |          |           |          |           |          |           |           |           |           |           |          |
|---------------|-----------|----------|-----------|----------|-----------|----------|-----------|-----------|-----------|-----------|-----------|----------|
| <i>CXCL1</i>  | 0.1643 ±  | 0.1051 ± | 0.4207 ±  | 0.7013 ± | 0.1247 ±  | 0.1145 ± | 0.1411 ±  | 0.0718 ±  | 0.0364 ±  | 0.0531 ±  | 0.0856 ±  | 0.0355 ± |
|               | 0.0394    | 0.0026   | 0.2015    | 0.2099   | 0.0283    | 0.0093   | 0.0031    | 0.0664    | 0.0140    | 0.0100    | 0.0466    | 0.0049   |
|               | 1         | 0.63     | 2.56      | 4.26     | 1         | 0.92     | 1.13      | 0.58      | 1         | 1.45      | 2.35      | 0.97     |
| <i>MIF</i>    | 0.3026 ±  | 0.1405 ± | 0.1518 ±  | 0.5929 ± | 0.2004 ±  | 0.1166 ± | 0.0750 ±  | 0.0662 ±  | 0.1529 ±  | 0.2342 ±  | 0.1196 ±  | 0.1598 ± |
|               | 0.1241    | 0.0475   | 0.1382    | 0.2086   | 0.0345    | 0.0150   | 0.0098    | 0.0574    | 0.0081    | 0.0975    | 0.0970    | 0.0607   |
|               | 1         | 0.46     | 0.50      | 1.95     | 1         | 0.58     | 0.37      | 0.33      | 1         | 1.53      | 0.78      | 1.04     |
| <i>NOS3</i>   | 0.0088 ±  | 0.0092 ± | 0.0024 ±  | 0.0258 ± | 0.0124 ±  | 0.0050 ± | 0.0144 ±  | 0.0031 ±  | 0.0005 ±  | 0.00025 ± | 0.00013 ± | 0.0001 ± |
|               | 0.0029    | 0.0017   | 0.0022    | 0.0056   | 0.0026    | 0.0009   | 0.0005    | 0.0027    | 0.00002   | 0.0001    | 0.0001    | 0.00003  |
|               | 1         | 1.04     | 0.27      | 2.93     | 1         | 0.40     | 1.16      | 0.25      | 1         | 0.5       | 0.26      | 0.2      |
| <i>SNAI1</i>  | 0.0017 ±  | 0.0104 ± | 0.0124 ±  | 0.0488 ± | 0.0113 ±  | 0.0078 ± | 0.0118 ±  | 0.0032 ±  | 0.0106 ±  | 0.0139 ±  | 0.0141 ±  | 0.0196 ± |
|               | 0.0008    | 0.0023   | 0.0024    | 0.0125   | 0.0025    | 0.0007   | 0.0004    | 0.0028    | 0.0037    | 0.0029    | 0.0058    | 0.0023   |
|               | 1         | 6.11     | 7.29      | 28.70    | 1         | 0.69     | 1.04      | 0.28      | 1         | 1.31      | 1.33      | 1.84     |
| <i>SNAI2</i>  | 0.0001 ±  | 0.0009 ± | 0.0008 ±  | 0.0011 ± | 0.0016 ±  | 0.0011 ± | 0.0006 ±  | 0.0007 ±  | 0.0134 ±  | 0.0172 ±  | 0.0210 ±  | 0.0434 ± |
|               | 0.0001    | 0.0002   | 0.0007    | 0.0005   | 0.0003    | 0.0002   | 0.0001    | 0.0006    | 0.0032    | 0.0034    | 0.0086    | 0.0084   |
|               | 1         | 9        | 8         | 11       | 1         | 0.69     | 0.38      | 0.44      | 1         | 1.28      | 1.56      | 3.23     |
| <i>TWIST1</i> | 0.00014 ± | 0.0001 ± | 0.00014 ± | 0.0002 ± | 0.00008 ± | 0.0001 ± | 0.00009 ± | 0.00004 ± | 0.00035 ± | 0.00032 ± | 0.00040 ± | 0.0014 ± |
|               | 0.0001    | 0.00001  | 0.0001    | 0.0001   | 0.00003   | 0.00002  | 0.00001   | 0.00003   | 0.0001    | 0.00004   | 0.0003    | 0.0002   |
|               | 1         | 0.71     | 1         | 1.42     | 1         | 1.25     | 1.13      | 0.50      | 1         | 0.91      | 1.14      | 4        |
| <i>ZEB1</i>   | 0.0110 ±  | 0.0062 ± | 0.0098 ±  | 0.0101 ± | 0.0230 ±  | 0.0101 ± | 0.0125 ±  | 0.0090 ±  | 0.0298 ±  | 0.0485 ±  | 0.0326 ±  | 0.0464 ± |
|               | 0.0049    | 0.0018   | 0.0088    | 0.0029   | 0.0046    | 0.0029   | 0.0016    | 0.0078    | 0.0078    | 0.0197    | 0.0273    | 0.0081   |
|               | 1         | 0.56     | 0.89      | 0.91     | 1         | 0.44     | 0.54      | 0.39      | 1         | 1.62      | 1.09      | 1.55     |
| <i>CDH5</i>   | 1.5391 ±  | 0.6480 ± | 0.8264 ±  | 1.4559 ± | 0.5347 ±  | 0.4014 ± | 0.2901 ±  | 0.1332 ±  | 0.1422 ±  | 0.1705 ±  | 0.1381 ±  | 0.0429 ± |
|               | 0.6716    | 0.1845   | 0.2449    | 0.2875   | 0.0538    | 0.0593   | 0.0321    | 0.1179    | 0.0384    | 0.0395    | 0.0517    | 0.0100   |
|               | 1         | 0.42     | 0.53      | 0.94     | 1         | 0.75     | 0.54      | 0.25      | 1         | 1.19      | 0.97      | 0.30     |
| <i>CDH2</i>   | 0.0754 ±  | 0.0573 ± | 0.1463 ±  | 0.0645 ± | 0.0655 ±  | 0.0568 ± | 0.0480 ±  | 0.0189 ±  | 0.0245 ±  | 0.0088 ±  | 0.0035 ±  | 0.0066 ± |
|               | 0.0276    | 0.0168   | 0.0555    | 0.0131   | 0.0088    | 0.0121   | 0.0008    | 0.0166    | 0.0072    | 0.0040    | 0.0038    | 0.0013   |

|               |           |           |          |          |          |          |           |          |           |           |           |           |
|---------------|-----------|-----------|----------|----------|----------|----------|-----------|----------|-----------|-----------|-----------|-----------|
|               | 1         | 0.75      | 1.94     | 0.85     | 1        | 0.87     | 0.73      | 0.29     | 1         | 0.35      | 0.14      | 0.26      |
| <i>HES1</i>   | 0.0161 ±  | 0.0073 ±  | 0.0091 ± | 0.0432 ± | 0.0141 ± | 0.0105 ± | 0.0118 ±  | 0.0071 ± | 0.0034 ±  | 0.0038 ±  | 0.0028 ±  | 0.0027 ±  |
|               | 0.0073    | 0.0026    | 0.0086   | 0.0070   | 0.0024   | 0.0018   | 0.0029    | 0.0062   | 0.0007    | 0.0013    | 0.0022    | 0.0008    |
|               | 1         | 0.45      | 0.56     | 2.68     | 1        | 0.74     | 0.84      | 0.50     | 1         | 1.11      | 0.82      | 0.79      |
| <i>HEY1</i>   | 0.0006 ±  | 0.0004 ±  | 0.0005 ± | 0.0011 ± | 0.0007 ± | 0.0005 ± | 0.0004 ±  | 0.0003 ± | 0.0001 ±  | 0.000027  | 0.0001 ±  | 0.00013 ± |
|               | 0.0021    | 0.0001    | 0.0005   | 0.0003   | 0.0001   | 0.0001   | 0.0002    | 0.0003   | 0.00002   | ±         | 0.00002   | 0.00002   |
|               |           |           |          |          |          |          |           |          |           | 0.000003  |           |           |
|               | 1         | 0.66      | 0.83     | 1.83     | 1        | 0.71     | 0.57      | 0.43     | 1         | 0.27      | 1         | 1.3       |
| <i>HEY2</i>   | 0.0014 ±  | 0.0010 ±  | 0.0005 ± | 0.0015 ± | 0.0006 ± | 0.0007 ± | 0.00068 ± | 0.0004 ± | 0.00037 ± | 0.00042 ± | 0.00034 ± | 0.00029 ± |
|               | 0.0004    | 0.0004    | 0.0005   | 0.0005   | 0.0002   | 0.0001   | 0.0001    | 0.0003   | 0.0002    | 0.0001    | 0.0002    | 0.0001    |
|               | 1         | 0.71      | 0.35     | 1.07     | 1        | 1.17     | 1.13      | 0.67     | 1         | 1.13      | 0.91      | 0.78      |
| <i>NOTCH1</i> | 0.00032 ± | 0.00035 ± | 0.0002 ± | 0.0008 ± | 0.0002 ± | 0.0003 ± | 0.00021 ± | 0.0001 ± | 0.00006 ± | 0.000034  | 0.000021  | 0.00003 ± |
|               | 0.0002    | 0.0001    | 0.0002   | 0.0003   | 0.00001  | 0.00004  | 0.00002   | 0.0001   | 0.00002   | ± 0.00001 | ± 0.00002 | 0.00001   |
|               | 1         | 1.09      | 0.62     | 2.5      | 1        | 1.50     | 1.05      | 0.50     | 1         | 0.56      | 0.35      | 0.5       |
| <i>NR2F2</i>  | 0.1904 ±  | 0.1894 ±  | 0.1762 ± | 0.2524 ± | 0.1639 ± | 0.1606 ± | 0.0744 ±  | 0.0775 ± | 0.2163    | 0.4126 ±  | 0.3195 ±  | 0.3240 ±  |
|               | 0.0556    | 0.0687    | 0.1606   | 0.0751   | 0.0405   | 0.0162   | 0.0203    | 0.0671   | ± 0.0493  | 0.1523    | 0.2714    | 0.0816    |
|               | 1         | 0.99      | 0.92     | 1.32     | 1        | 0.98     | 0.45      | 0.47     | 1         | 1.90      | 1.47      | 1.49      |



**Table S4.** Average  $\Delta\text{Ct}$  values and their standard deviations (HITAEC).

|              | HITAEC                      |                         |                        |                        |                                                   |                         |                         |                        |                        |                        |                        |                        |
|--------------|-----------------------------|-------------------------|------------------------|------------------------|---------------------------------------------------|-------------------------|-------------------------|------------------------|------------------------|------------------------|------------------------|------------------------|
|              | Complete conditioned medium |                         |                        |                        | Extracellular vesicle-depleted conditioned medium |                         |                         |                        | Extracellular vesicles |                        |                        |                        |
|              | PBS                         | MPP                     | CPP-P                  | CPP-S                  | PBS                                               | MPP                     | CPP-P                   | CPP-S                  | PBS                    | MPP                    | CPP-P                  | CPP-S                  |
| <i>VCAM1</i> | 0.0065 $\pm$<br>0.0020      | 0.0032 $\pm$<br>0.0008  | 0.0050 $\pm$<br>0.0005 | 0.0045 $\pm$<br>0.0002 | 0.0077 $\pm$<br>0.0015                            | 0.0191 $\pm$<br>0.0035  | 0.0161 $\pm$<br>0.0228  | 0.0467 $\pm$<br>0.0099 | -                      | -                      | -                      | -                      |
|              | 1                           | 0.49                    | 0.76                   | 0.69                   | 1                                                 | 2.48                    | 2.09                    | 6.06                   | -                      | -                      | -                      | -                      |
|              |                             |                         |                        |                        |                                                   |                         |                         |                        |                        |                        |                        |                        |
| <i>ICAM1</i> | 0.1317 $\pm$<br>0.0206      | 0.0685 $\pm$<br>0.0218  | 0.0501 $\pm$<br>0.0434 | 0.0889 $\pm$<br>0.0434 | 0.0488 $\pm$<br>0.0151                            | 0.0411 $\pm$<br>0.0151  | 0.0467 $\pm$<br>0.0042  | 0.0424 $\pm$<br>0.0068 | 0.0126 $\pm$<br>0.0070 | 0.0047 $\pm$<br>0.0009 | 0.0099 $\pm$<br>0.0034 | 0.0042 $\pm$<br>0.0011 |
|              | 1                           | 0.52                    | 0.38                   | 0.67                   | 1                                                 | 0.84                    | 0.96                    | 0.87                   | 1                      | 0.37                   | 0.78                   | 0.33                   |
|              |                             |                         |                        |                        |                                                   |                         |                         |                        |                        |                        |                        |                        |
| <i>SELE</i>  | 0.0065 $\pm$<br>0.0025      | 0.0107 $\pm$<br>0.0026  | 0.0088 $\pm$<br>0.0077 | 0.0108 $\pm$<br>0.0015 | 0.0159 $\pm$<br>0.0035                            | 0.0145 $\pm$<br>0.0028  | 0.0279 $\pm$<br>0.0284  | 0.0406 $\pm$<br>0.0124 | 0.0050 $\pm$<br>0.0015 | 0.0024 $\pm$<br>0.0004 | 0.0005 $\pm$<br>0.0005 | 0.0043 $\pm$<br>0.0004 |
|              | 1                           | 1.64                    | 1.35                   | 1.66                   | 1                                                 | 0.92                    | 1.75                    | 2.55                   | 1                      | 0.48                   | 0.1                    | 0.86                   |
|              |                             |                         |                        |                        |                                                   |                         |                         |                        |                        |                        |                        |                        |
| <i>SELP</i>  | 0.0039 $\pm$<br>0.0017      | 0.0019 $\pm$<br>0.0004  | 0.0040 $\pm$<br>0.0001 | 0.0043 $\pm$<br>0.0008 | 0.0035 $\pm$<br>0.0008                            | 0.0167 $\pm$<br>0.0031  | 0.0134 $\pm$<br>0.0049  | 0.0214 $\pm$<br>0.0069 | 0.0019 $\pm$<br>0.0013 | 0.0025 $\pm$<br>0.0011 | 0.0008 $\pm$<br>0.0003 | 0.0016 $\pm$<br>0.0005 |
|              | 1                           | 0.48                    | 1.02                   | 1.10                   | 1                                                 | 4.77                    | 3.83                    | 6.11                   | 1                      | 1.31                   | 0.42                   | 0.84                   |
|              |                             |                         |                        |                        |                                                   |                         |                         |                        |                        |                        |                        |                        |
| <i>IL6</i>   | 0.00061 $\pm$<br>0.0002     | 0.00057 $\pm$<br>0.0001 | 0.0005 $\pm$<br>0.0005 | 0.0029 $\pm$<br>0.0003 | 0.0009 $\pm$<br>0.0002                            | 0.00083 $\pm$<br>0.0001 | 0.00082 $\pm$<br>0.0008 | 0.0027 $\pm$<br>0.0009 | 0.0050 $\pm$<br>0.0020 | 0.0032 $\pm$<br>0.0012 | 0.0032 $\pm$<br>0.0028 | 0.0036 $\pm$<br>0.0003 |
|              | 1                           | 0.93                    | 0.81                   | 4.75                   | 1                                                 | 0.92                    | 0.91                    | 3.00                   | 1                      | 0.64                   | 0.64                   | 0.72                   |
|              |                             |                         |                        |                        |                                                   |                         |                         |                        |                        |                        |                        |                        |
| <i>CXCL8</i> | 0.0405 $\pm$<br>0.0162      | 0.0877 $\pm$<br>0.0240  | 0.0921 $\pm$<br>0.0043 | 0.1023 $\pm$<br>0.0195 | 0.0758 $\pm$<br>0.0168                            | 0.0670 $\pm$<br>0.0129  | 0.1903 $\pm$<br>0.0701  | 0.1787 $\pm$<br>0.0575 | 0.0750 $\pm$<br>0.0231 | 0.0519 $\pm$<br>0.0161 | 0.0269 $\pm$<br>0.0239 | 0.0676 $\pm$<br>0.0023 |
|              | 1                           | 2.16                    | 2.27                   | 2.52                   | 1                                                 | 0.88                    | 2.51                    | 2.36                   | 1                      | 0.69                   | 0.35                   | 0.90                   |
|              |                             |                         |                        |                        |                                                   |                         |                         |                        |                        |                        |                        |                        |
| <i>CCL2</i>  | 0.3029 $\pm$<br>0.1448      | 0.1573 $\pm$<br>0.0483  | 0.2993 $\pm$<br>0.0181 | 0.3437 $\pm$<br>0.0644 | 0.1682 $\pm$<br>0.0371                            | 0.1510 $\pm$<br>0.0303  | 0.2311 $\pm$<br>0.1006  | 0.2640 $\pm$<br>0.0915 | 0.2483 $\pm$<br>0.0798 | 0.2611 $\pm$<br>0.0749 | 0.1368 $\pm$<br>0.0021 | 0.2736 $\pm$<br>0.0082 |
|              | 1                           | 0.51                    | 0.98                   | 1.13                   | 1                                                 | 0.90                    | 1.37                    | 1.57                   | 1                      | 1.05                   | 0.55                   | 1.10                   |
|              |                             |                         |                        |                        |                                                   |                         |                         |                        |                        |                        |                        |                        |

|               |           |           |          |           |           |           |           |           |           |           |           |           |
|---------------|-----------|-----------|----------|-----------|-----------|-----------|-----------|-----------|-----------|-----------|-----------|-----------|
| <i>CXCL1</i>  | 0.1143 ±  | 0.1280 ±  | 0.1108 ± | 0.1670 ±  | 0.0473 ±  | 0.0592 ±  | 0.1033 ±  | 0.1143 ±  | 0.0577 ±  | 0.0914 ±  | 0.0578 ±  | 0.0620 ±  |
|               | 0.0538    | 0.0348    | 0.0048   | 0.0292    | 0.0171    | 0.0107    | 0.0456    | 0.0632    | 0.0181    | 0.0550    | 0.0117    | 0.0111    |
|               | 1         | 1.11      | 0.96     | 1.46      | 1         | 1.25      | 2.18      | 2.42      | 1         | 1.58      | 1         | 1.07      |
| <i>MIF</i>    | 0.2785 ±  | 0.2478 ±  | 0.2209 ± | 0.4082 ±  | 0.1057 ±  | 0.0791 ±  | 0.1260 ±  | 0.1719 ±  | 0.6260 ±  | 0.4185 ±  | 0.4373 ±  | 0.7639 ±  |
|               | 0.1114    | 0.0668    | 0.1915   | 0.0789    | 0.0277    | 0.0160    | 0.1221    | 0.0623    | 0.2575    | 0.1443    | 0.3912    | 0.0288    |
|               | 1         | 0.88      | 0.79     | 1.46      | 1         | 0.75      | 1.19      | 1.63      | 1         | 0.66      | 0.69      | 1.22      |
| <i>NOS3</i>   | 0.0164 ±  | 0.0026 ±  | 0.0042 ± | 0.0046 ±  | 0.0021 ±  | 0.0037 ±  | 0.0024 ±  | 0.0070 ±  | 0.00026 ± | 0.00004 ± | -         | 0.00005 ± |
|               | 0.0071    | 0.0005    | 0.0036   | 0.0014    | 0.0005    | 0.0010    | 0.0023    | 0.0027    | 0.0002    | 0.00003   |           | 0.00003   |
|               | 1         | 0.15      | 0.25     | 0.28      | 1         | 1.76      | 1.14      | 3.33      | 1         | 0.15      | -         | 0.19      |
| <i>SNAI1</i>  | 0.0082 ±  | 0.0092 ±  | 0.0148 ± | 0.0079 ±  | 0.0040 ±  | 0.0026 ±  | 0.0023 ±  | 0.0038 ±  | 0.0092 ±  | 0.0054 ±  | 0.0025 ±  | 0.0057 ±  |
|               | 0.0026    | 0.0025    | 0.0017   | 0.0012    | 0.0007    | 0.0006    | 0.0022    | 0.0003    | 0.0043    | 0.0018    | 0.0022    | 0.0011    |
|               | 1         | 1.12      | 1.80     | 0.96      | 1         | 0.65      | 0.58      | 0.95      | 1         | 0.58      | 0.27      | 0.61      |
| <i>SNAI2</i>  | 0.0003 ±  | 0.00022 ± | 0.0006 ± | 0.00024 ± | 0.000018  | 0.00001 ± | 0.000022  | 0.00004 ± | 0.0006 ±  | 0.0007 ±  | 0.0010 ±  | 0.0002 ±  |
|               | 0.0001    | 0.00004   | 0.0001   | 0.0002    | ± 0.00001 | 0.00001   | ± 0.00001 | 0.00003   | 0.0003    | 0.0002    | 0.0001    | 0.0001    |
|               | 1         | 0.73      | 2        | 0.8       | 1         | 0.56      | 1.22      | 2.22      | 1         | 1.16      | 1.66      | 0.33      |
| <i>TWIST1</i> | 0.00001 ± | 0.00001 ± | 0.000003 | -         | 0.00001 ± | 0.000002  | 0.000003  | 0.000004  | 0.00016 ± | 0.00020 ± | 0.00011 ± | 0.0001 ±  |
|               | 0.000001  | 0.00001   | ±        |           | 0.000002  | ±         | ±         | ±         | 0.0001    | 0.00003   | 0.0001    | 0.0001    |
|               |           |           | 0.000004 |           |           | 0.000001  | 0.000001  | 0.000003  |           |           |           |           |
|               | 1         | 1         | 0.3      | -         | 1         | 0.20      | 0.30      | 0.40      | 1         | 1.25      | 0.68      | 0.62      |
| <i>ZEB1</i>   | 0.0045 ±  | 0.0070 ±  | 0.0039 ± | 0.0040 ±  | 0.0097 ±  | 0.0121 ±  | 0.0077 ±  | 0.0193 ±  | 0.0371 ±  | 0.0495 ±  | 0.0196 ±  | 0.0308 ±  |
|               | 0.0019    | 0.0018    | 0.0034   | 0.0011    | 0.0039    | 0.0034    | 0.0015    | 0.0055    | 0.0118    | 0.0140    | 0.0170    | 0.0017    |
|               | 1         | 1.55      | 0.86     | 0.88      | 1         | 1.25      | 0.79      | 1.99      | 1         | 1.33      | 0.52      | 0.83      |
| <i>CDH5</i>   | 0.6622 ±  | 1.0498 ±  | 0.6092 ± | 1.5231 ±  | 0.3708 ±  | 0.5407 ±  | 0.4729 ±  | 0.4295 ±  | 0.0905 ±  | 0.0591 ±  | 0.0289 ±  | 0.0001 ±  |
|               | 0.3683    | 0.2574    | 0.0339   | 0.2239    | 0.0998    | 0.0932    | 0.1358    | 0.1596    | 0.0353    | 0.0281    | 0.0050    | 0.0001    |
|               | 1         | 1.58      | 0.91     | 2.30      | 1         | 1.46      | 1.28      | 1.16      | 1         | 0.65      | 0.31      | 0.001     |

|               |           |           |           |           |           |           |           |           |           |           |           |           |
|---------------|-----------|-----------|-----------|-----------|-----------|-----------|-----------|-----------|-----------|-----------|-----------|-----------|
| <i>CDH2</i>   | 0.0010 ±  | 0.0013 ±  | 0.0012 ±  | 0.0008 ±  | 0.0014 ±  | 0.0014 ±  | 0.0257 ±  | 0.0015 ±  | 0.00002 ± | -         | -         | 0.000024  |
|               | 0.0005    | 0.0003    | 0.0001    | 0.0001    | 0.0004    | 0.0001    | 0.0415    | 0.0004    | 0.00002   |           |           | ± 0.00001 |
|               | 1         | 1.3       | 1.2       | 0.8       | 1         | 1         | 18.36     | 1.07      | 1         | -         | -         | 1.2       |
| <i>HES1</i>   | 0.0322 ±  | 0.0195 ±  | 0.0164 ±  | 0.0266 ±  | 0.0135 ±  | 0.0147 ±  | 0.0084 ±  | 0.0228 ±  | 0.0079 ±  | 0.0087 ±  | 0.0048 ±  | 0.0045 ±  |
|               | 0.0138    | 0.0040    | 0.0142    | 0.0044    | 0.0034    | 0.0036    | 0.0081    | 0.0071    | 0.0036    | 0.0029    | 0.0042    | 0.0006    |
|               | 1         | 0.60      | 0.50      | 0.82      | 1         | 1.09      | 0.62      | 1.69      | 1         | 1.10      | 0.60      | 0.56      |
| <i>HEY1</i>   | 0.0035 ±  | 0.0031 ±  | 0.0055 ±  | 0.0038 ±  | 0.0026 ±  | 0.0024 ±  | 0.0018 ±  | 0.0028 ±  | 0.00049 ± | 0.0007 ±  | 0.0002 ±  | 0.0003 ±  |
|               | 0.0004    | 0.0006    | 0.0013    | 0.0005    | 0.0005    | 0.0006    | 0.0008    | 0.0007    | 0.0001    | 0.0001    | 0.0002    | 0.0001    |
|               | 1         | 0.88      | 1.57      | 1.08      | 1         | 0.92      | 0.69      | 1.08      | 1         | 1.42      | 0.40      | 0.61      |
| <i>HEY2</i>   | 0.00004 ± | 0.00003 ± | 0.00003 ± | 0.000037  | 0.000028  | 0.000026  | 0.000023  | 0.00005 ± | 0.00003 ± | 0.00004 ± | 0.00004 ± | 0.000028  |
|               | 0.00001   | 0.00001   | 0.00003   | ± 0.00002 | ± 0.00001 | ± 0.00001 | ± 0.00002 | 0.00004   | 0.00001   | 0.00002   | 0.0001    | ± 0.00001 |
|               | 1         | 0.75      | 0.75      | 0.92      | 1         | 0.93      | 0.82      | 1.79      | 1         | 1.33      | 1.33      | 0.66      |
| <i>NOTCH1</i> | 0.0016 ±  | 0.0006 ±  | 0.0007 ±  | 0.0009 ±  | 0.00038 ± | 0.0005 ±  | 0.0003 ±  | 0.00041 ± | 0.000038  | 0.000043  | 0.00002 ± | 0.00005 ± |
|               | 0.0008    | 0.0002    | 0.0006    | 0.0003    | 0.00007   | 0.0001    | 0.0001    | 0.00004   | ± 0.00002 | ± 0.00003 | 0.00002   | 0.00002   |
|               | 1         | 0.37      | 0.43      | 0.56      | 1         | 1.32      | 0.79      | 1.08      | 1         | 1.13      | 0.52      | 1.31      |
| <i>NR2F2</i>  | 0.2214 ±  | 0.1408 ±  | 0.1402 ±  | 0.1667 ±  | 0.1975 ±  | 0.1935 ±  | 0.1049 ±  | 0.2387 ±  | 0.3789 ±  | 0.6154 ±  | 0.3386 ±  | 0.6618 ±  |
|               | 0.0892    | 0.0316    | 0.1222    | 0.0003    | 0.0322    | 0.0167    | 0.1100    | 0.0763    | 0.1619    | 0.1671    | 0.2941    | 0.0772    |
|               | 1         | 0.63      | 0.63      | 0.75      | 1         | 0.98      | 0.53      | 1.21      | 1         | 1.62      | 0.89      | 1.74      |
